# Supplementary material for: Antimicrobial Resistance Profiles and Genetic Typing of Salmonella Serovars from Chicken Embryos in China
Source: MDPI journal article supplement (doi:10.3390/antibiotics10101156), 2021-09-24
Supplement: s1 [file s1]

# Antimicrobial resistance profiles and genetic typing of *Salmonella* serovars from chicken embryos in China

Yaohui Xu <sup>1,†</sup>, Xiao Zhou <sup>2,†</sup>, Zenghai Jiang <sup>1</sup>, Yaru Qi <sup>1</sup>, Abdelaziz Ed-Dra <sup>3</sup>, Min Yue <sup>2,3,4,5,\*</sup>

<sup>1</sup> College of Veterinary Medicine, Henan University of Animal Husbandry and Economy, Zhengzhou 450046, China; 80588@hnuahe.edu.cn (Y.X.); 80147@hnuahe.edu.cn (Z.J.); q15837181937@163.com (Y.Q.)

<sup>2</sup> Department of Veterinary Medicine & Institute of Preventive Veterinary Sciences, Zhejiang University College of Animal Sciences, Hangzhou 310058, China; xiaozhou@zju.edu.cn

<sup>3</sup> Hainan Institute of Zhejiang University, Sanya 572025, China; abdelaziz\_iaa@yahoo.fr

<sup>4</sup> National Clinical Research Center for Infectious Diseases, National Medical Center for Infectious Diseases, State Key Laboratory for Diagnosis and Treatment of Infectious Diseases, The First Affiliated Hospital, College of Medicine, Zhejiang University, Hangzhou 310003, China

<sup>5</sup> Zhejiang Provincial Key Laboratory of Preventive Veterinary Medicine, Hangzhou 310058, China

\* Correspondence: myue@zju.edu.cn

† These authors contributed equally to this work.

## Supplementary Figures

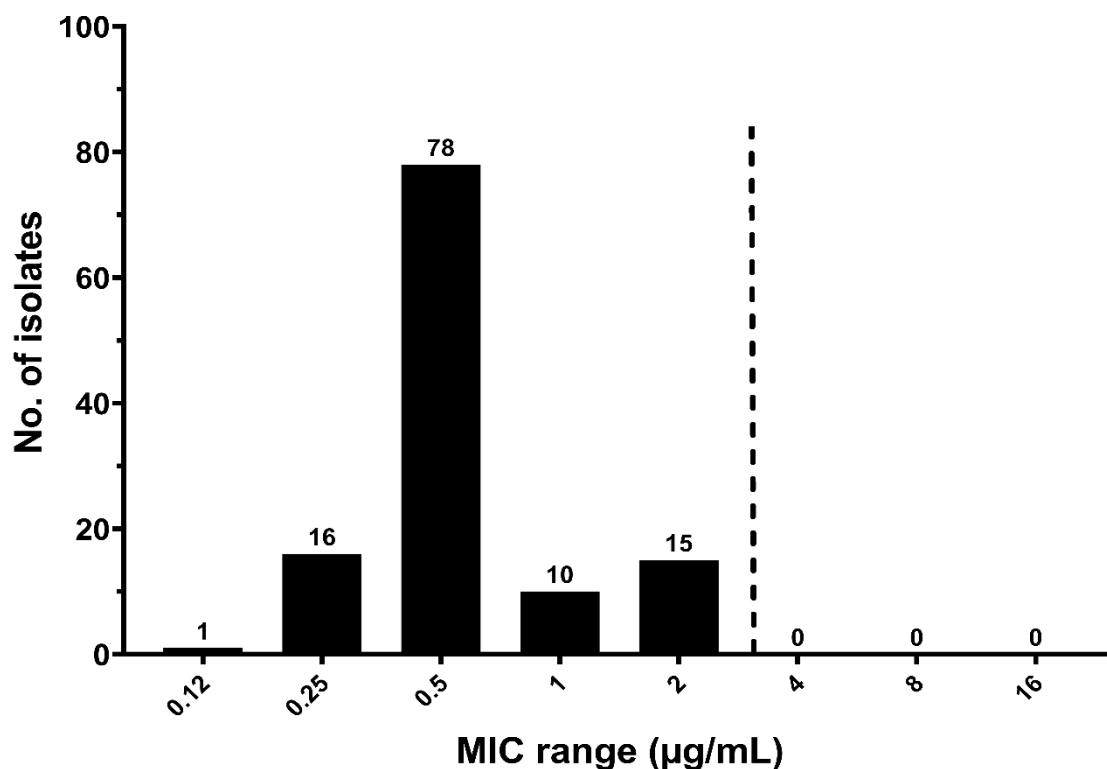

**Figure S1.** The distribution of minimum inhibitory concentration (MIC) values among the examined *Salmonella* isolates (n=120) against Colistin (CST). The dashed line indicates the cutoff level of the MIC, in which the lowest values correspond to susceptibility and the highest values correspond to the resistance.

## Supplementary Tables

**Table S1:** Primers used for the detection of antimicrobial resistance genes.

| Target                                | Forward primer (5'–3')   | Reverse primer (5'–3')   | Annealing Temperature (°C) | Product size (bp) | References |
|---------------------------------------|--------------------------|--------------------------|----------------------------|-------------------|------------|
| <b><i>β</i>-Lactamases and ESBLs:</b> |                          |                          |                            |                   |            |
| <i>bla</i> <sub>TEM</sub>             | GTATTCAACATTTCCGTGTCG    | CCAATGCTTAATCAGTGAGGC    | 55                         | 854               | [1]        |
| <i>bla</i> <sub>SHV</sub>             | CCCTGTTAGCCACCCTGCCG     | CGTTGCCAGTGCTCGATCAGC    | 68                         | 829               | [1]        |
| <i>bla</i> <sub>CTX-M-1</sub>         | GCTGTTGTTAGGAAGTGTGCCGC  | GCCGCCGACGCTAATACATC     | 63                         | 798               | [1]        |
| <i>bla</i> <sub>CTX-M-2</sub>         | AAATGTGCTGCTCCTTTCGTGAGC | AGGGTTCGTTGCAAGACAAGACTG | 55                         | 1122              | [2]        |
| <i>bla</i> <sub>CTX-M-3</sub>         | GTTACAATGTGTGAGAAGCAG    | CCGTTTCCGCTATTACAAAC     | 55                         | 1018              | [3]        |
| <i>bla</i> <sub>CTX-M-8</sub>         | TAACGCACAGACGCTCTACC     | TGGCTGGGTGAAGTAAGTGAC    | 55                         | 637               | [4]        |
| <i>bla</i> <sub>CTX-M-9</sub>         | GATCAGTCAGTGGGATAGTTT    | TACTCGGCGTTAACTGATTA     | 47                         | 671               | [5]        |
| <i>bla</i> <sub>CTX-M-25</sub>        | GCGATGTTAATGACGACAGC     | AACCGTCGGTGACAATTCTG     | 55                         | 847               | [4]        |
| <i>bla</i> <sub>OXA-1</sub>           | ACACAATACATATCAACTTCGC   | AGTGTGTTTAGAATGGTGATC    | 55                         | 814               | [3]        |
| <i>bla</i> <sub>OXA-2</sub>           | TTCAAGCCAAAGGCACGATAG    | TCCGAGTTGACTGCCGGGTTG    | 60                         | 703               | [3]        |
| <i>bla</i> <sub>OXA-10</sub>          | CGTGCTTTGTAAAAGTAGCAG    | CATGATTTTGGTGGGAATGG     | 55                         | 389               | [3]        |
| <i>bla</i> <sub>PSE</sub>             | TGCTTCGCAACTATGACTAC     | AGCCTGTGTTTGAGCTAGAT     | 55                         | 438               | [3]        |
| <b>Cephalosporins:</b>                |                          |                          |                            |                   |            |
| <i>bla</i> <sub>MOX</sub>             | GCTGCTCAAGGAGCACAGGAT    | CACATTGACATAGGTGTGGTGC   | 55                         | 520               | [6]        |
| <i>bla</i> <sub>CIT</sub>             | TGGCCAGAACTGACAGGCCAAA   | TTTCTCCTGAACGTGGCTGGC    | 55                         | 462               | [6]        |
| <i>bla</i> <sub>DHA</sub>             | AACTTTCACAGGTGTGCTGGGT   | CCGTACGCATACTGGCTTTGC    | 55                         | 405               | [6]        |
| <i>bla</i> <sub>ACC</sub>             | AACAGCCTCAGCAGCCGGTTA    | TTCGCCGCAATCATCCCTAGC    | 55                         | 346               | [6]        |
| <i>bla</i> <sub>EBC</sub>             | TCGGTAAAGCCGATGTTGCGG    | CTTCCACTGCGGCTGCCAGTT    | 55                         | 302               | [6]        |
| <i>bla</i> <sub>FOX</sub>             | AACATGGGGTATCAGGGAGATG   | CAAAGCGCGTAACCGGATTGG    | 55                         | 190               | [6]        |
| <b>Aminoglycosides:</b>               |                          |                          |                            |                   |            |
| <i>armA</i>                           | CAAATGGATAAGAATGATGTT    | TTATTTCTGAAATCCACT       | 55                         | 777               | [7]        |
| <i>rmtA</i>                           | ATGAGCTTTGACGATGCCCTA    | TCACTTATTCCTTTTATCATG    | 55                         | 756               | [7]        |
| <i>rmtB</i>                           | ATGAACATCAACGATGCCCT     | CCTTCTGATTGGCTTATCCA     | 55                         | 769               | [7]        |
| <i>rmtC</i>                           | CGAAGAAGTAACAGCCAAAG     | ATCCCAACATCTCTCCCACT     | 55                         | 711               | [7]        |
| <i>rmtD</i>                           | CGGCACGCGATTGGGAAGC      | CGGAAACGATGCGACGAT       | 55                         | 401               | [7]        |
| <i>rmtE</i>                           | ATGAATATTGATGAAATGGTTGC  | TGATTGATTTCCTCCGTTTTTG   | 55                         | 819               | [7]        |
| <i>npmA</i>                           | CTCAAAGGAACAAAGACGG      | GAAACATGGCCAGAAACTC      | 55                         | 641               | [8]        |
| <i>aac(3)-IV</i>                      | GTTACACCGGACCTTGGA       | AACGGCATTGAGCGTCAG       | 55                         | 674               | [9]        |

|                   |                         |                         |    |          |      |
|-------------------|-------------------------|-------------------------|----|----------|------|
| <i>aac6'-Ib</i>   | TTGCGATGCTCTATGAGTGGCTA | CTCGAATGCCTGGCGTGTTT    | 55 | 482      | [10] |
| <i>aadA1-like</i> | GTGGATGGCGGCCTGAAGCC    | ATTGCCCAGTCGGCAGCG      | 55 | 527/1916 | [9]  |
| Sulphonamides:    |                         |                         |    |          |      |
| <i>sul1</i>       | TGGCGTCGCGACTGCGAAAT    | TGGTGACGGTGTTTCGGCATTCT | 55 | 813      | [11] |
| <i>sul2</i>       | GTTTCTCCGATGGAGGCCGGT   | AGCGAGGTTTCGGGAGCAGC    | 55 | 517      | [11] |
| <i>sul3</i>       | GATAGTTTTTCCGATGGAGG    | GAAGCCCATAACCCGGATCAA   | 55 | 495      | [11] |
| Tetracyclines:    |                         |                         |    |          |      |
| <i>tetA</i>       | TGGTCCGGAGGCCAGACGTG    | TTCCGAGCATGAGTGCCCGC    | 55 | 867      | [11] |
| <i>tetG</i>       | TCTTGCAGGAGCCGCAGTCGAT  | GGCCGGCATGCCAACACCC     | 55 | 721      | [11] |
| <i>tetX</i>       | CAATAATTGGTGGTGGACCC    | TTCTTACCTTGGACATCCCG    | 55 | 468      | [11] |
| <i>tetB</i>       | AAATAACAGCAAACAGTAATGG  | AAGTAGGGGTTGAGACGCAGCTA | 55 | 493      | [12] |
| <i>tetC</i>       | TCTAACAATGCGCTCATCGT    | GGTTGAAGGCTCTCAAGGGC    | 55 | 589      | [12] |
| <i>tetR</i>       | AGGACGACGGTGCTTGCT      | ATGAGGACTGGCGGGTGT      | 55 | 295      | [12] |

## References

1. González-Sanz, R.; Herrera-León, S.; de la Fuente, M.; Arroyo, M.; Echeita, M.A. Emergence of extended-spectrum  $\beta$ -lactamases and AmpC-type  $\beta$ -lactamases in human *Salmonella* isolated in Spain from 2001 to 2005. *J. Antimicrob. Chemother.* **2009**, *64*, 1181–1186, doi:10.1093/jac/dkp361.
2. Garcia, D.D.O.; Doi, Y.; Szabo, D.; Adams-Haduch, J.M.; Vaz, T.M.I.; Leite, D.; Padoveze, M.C.; Freire, M.P.; Silveira, F.P.; Paterson, D.L. Multiclonal outbreak of *Klebsiella pneumoniae* producing extended-spectrum  $\beta$ -lactamase CTX-M-2 and novel variant CTX-M-59 in a neonatal intensive care unit in Brazil. *Antimicrob. Agents Chemother.* **2008**, *52*, 1790–1793, doi:10.1128/AAC.01440-07.
3. Riaño, I.; Moreno, M.A.; Teshager, T.; Sáenz, Y.; Domínguez, L.; Torres, C. Detection and characterization of extended-spectrum  $\beta$ -lactamases in *Salmonella enterica* strains of healthy food animals in Spain. *J. Antimicrob. Chemother.* **2006**, *58*, 844–847, doi:10.1093/jac/dkl337.
4. Eller, C.; Simon, S.; Miller, T.; Frick, J.S.; Prager, R.; Rabach, W.; Guerra, B.; Werner, G.; Pfeifer, Y. Presence of  $\beta$ -lactamases in extended-spectrum-cephalosporin-resistant *Salmonella enterica* of 30 different serovars in Germany 2005–11. *J. Antimicrob. Chemother.* **2013**, *68*, 1978–1981, doi:10.1093/jac/dkt163.
5. Coque, T.M.; Oliver, A.; Pérez-Díaz, J.C.; Baquero, F.; Cantón, R. Genes encoding TEM-4, SHV-2, and CTX-M-10 extended-spectrum  $\beta$ -lactamases are carried by multiple *Klebsiella pneumoniae* clones in a single hospital (Madrid, 1989 to 2000). *Antimicrob. Agents Chemother.* **2002**, *46*, 500–510, doi:10.1128/AAC.46.2.500-510.2002.
6. Pérez-Pérez, F.J.; Hanson, N.D. Detection of plasmid-mediated AmpC  $\beta$ -lactamase genes in clinical isolates by using multiplex PCR. *J. Clin. Microbiol.* **2002**, *40*, 2153–2162, doi:10.1128/JCM.40.6.2153-2162.2002.
7. Granier, S.A.; Hidalgo, L.; Millan, A.S.; Escudero, J.A.; Gutierrez, B.; Brisabois, A.; Gonzalez-Zorn, B. ArmA methyltransferase in a monophasic *Salmonella enterica* isolate from food. *Antimicrob. Agents Chemother.* **2011**, *55*, 5262–5266, doi:10.1128/AAC.00308-11.
8. Fritsche, T.R.; Castanheira, M.; Miller, G.H.; Jones, R.N.; Armstrong, E.S. Detection of methyltransferases conferring high-level resistance to aminoglycosides in enterobacteriaceae from Europe, North America, and Latin America. *Antimicrob. Agents Chemother.* **2008**, *52*, 1843–1845, doi:10.1128/AAC.01477-07.
9. Guerra, B.; Junker, E.; Miko, A.; Helmuth, R.; Mendoza, M.C. Characterization and localization of drug resistance determinants in multidrug-resistant, integron-carrying *Salmonella enterica* serotype typhimurium strains. *Microb. Drug Resist.* **2004**, *10*, 83–91, doi:10.1089/1076629041310136.
10. de Toro, M.; Rojo-Bezares, B.; Vinué, L.; Undabeitia, E.; Torres, C.; Sáenz, Y. In vivo selection of aac(6')-Ib-cr and mutations in the gyrA gene in a clinical qnrS1-positive *Salmonella enterica* serovar Typhimurium DT104B strain recovered after fluoroquinolone treatment. *J. Antimicrob. Chemother.* **2010**, *65*, 1945–1949, doi:10.1093/jac/dkq262.
11. Lu, S.; Juan, W.; XiuMei, H.; ZhiNa, Q.; JunWei, W.; RuiMei, Y.; ZengRen, Z. Detection of *Salmonella* resistance genes and correlation analysis of drug resistance in broiler slaughter production chain. *China Anim. Heal. Insp.* **2017**, *34*, 35–42.
12. YaoHui, X.; TongWei, D.; YaRu, Q.; WenLong, H.; JianZhou, L.; ZengHai, J. Isolation, identification and antimicrobial resistance of *Salmonella* from dead chicken embryos in Sanhuang breeder farms. *Acta Vet. Zootech. Sin.* **2018**, *49*, 1081–1088.
